# Supplementary material for: Molecular Mechanism of Mutational Disruption of DCLK1 Autoinhibition Provides a Rationale for Inhibitor Screening
Source: MDPI journal article supplement (doi:10.3390/ijms241814020), 2023-09-13
Supplement: s1 [file s1]

## Supplementary Material

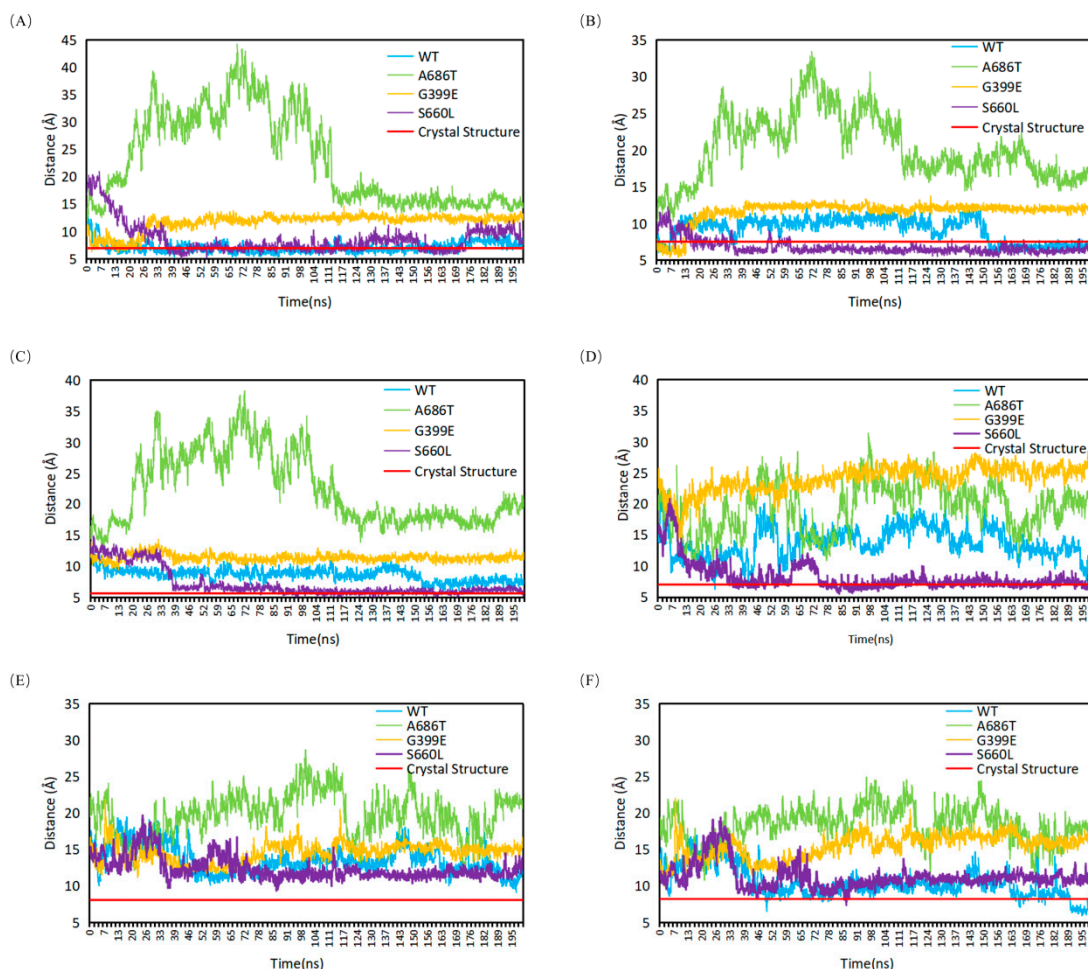

**Supplemental Figure S1 Variations of selected distances between the C $\alpha$  atoms of the amino acids with simulation time.** The red horizontal line is the distance value in the crystal structure, and the blue, green, orange and purple curves represent the wild type, A686T mutant, G399E mutant and S660L mutant respectively. (A) to (E) show the change of the distance of the C $\alpha$  atoms between V682-L467, V684-L518, I685-M465, V690-I433, K692-D533, K692-D511 during the simulations. Because of the change of hydrophobicity, the variation of A686T mutant is generally larger, and the fluctuation of residues in R3 region(V690-I433) is higher than that in R2 region. It is speculated that the multi-turn area on the N end of R2 helix plays a role in the stability of the structure of the R2 and in its binding with KD.

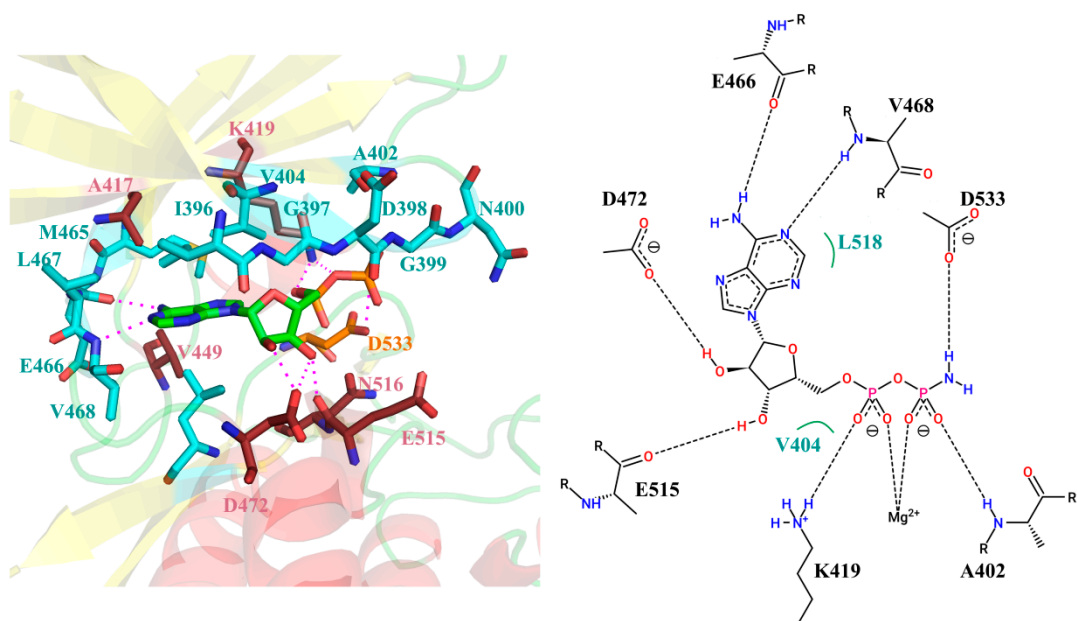

**Supplemental Figure S2 The structure and the interaction pattern of DCLK1 with AMPPN(PDB ID: 5JZJ).** The amino group of adenine forms a hydrogen bond with the carbonyl of the backbone of E466, N<sub>1</sub> forms a hydrogen bond with the amide nitrogen of the backbone of V468, and the imidazole ring forms a hydrogen bond with the methyl group of V404. The oxygen and hydroxyl groups of the ribose ring form a hydrogen bond network with D472, G397, and E515, and the phosphate group forms hydrogen bonds with K419, G399, A402, and D533.

| PDB ID | Kinase  | Ligand HET-code | IFP similarity |
|--------|---------|-----------------|----------------|
| 6ZLN   | CLK1    | PKB             | 0.83           |
| 4XG9   | SYK     | X9G*            | 0.82           |
| 6YID   | ULK1    | EDJ*            | 0.80           |
| 2C5Y   | CDK2    | MTW             | 0.79           |
| 2R3F   | CDK2    | SC8             | 0.79           |
| 2R3Q   | CDK2    | 5SC             | 0.79           |
| 2VV9   | CDK2    | IM9*            | 0.79           |
| 5T1H   | CSNK2A1 | 75E             | 0.77           |
| 1OIQ   | CDK2    | H DU            | 0.76           |
| 4HGS   | CSNK1G3 | 15G             | 0.76           |
| 6PJX   | GRK5    | SGV*            | 0.76           |
| 6NZH   | TYK2-b  | L9A             | 0.75           |
| 5L2S   | CDK6    | 6ZV*            | 0.75           |
| 7AW0   | MERTK   | S4Q             | 0.75           |

**Supplemental Table S1 The small molecules obtained from preliminary screening in the KLIFS database.** Small molecules marked with \* can form hydrogen bonds with D533 after docking.

| PDB ID | Kinase | Ligand<br>HET-code | IFP<br>similarity | Structure<br>of the ligand                                                         |
|--------|--------|--------------------|-------------------|------------------------------------------------------------------------------------|
| 4XG9   | SYK    | X9G                | 0.82              | 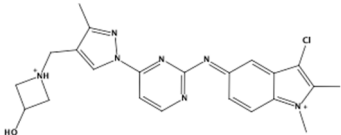 |
| 2VV9   | CDK2   | IM9                | 0.79              |  |
| 6PJX   | GRK5   | SGV                | 0.76              |  |
| 5L2S   | CDK6   | 6ZV                | 0.75              |  |

**Supplemental Table S2 The four more plausible small molecules screened by the binding mode with DCLK1 after the docking, especially whether it can occupy the binding site of D533.**
